# Supplementary material for: Color conversion of the magnetically separable Al/Fe oxide RNGO in the selective oxidation of benzyl alcohol induced the observation of its morphology change
Source: Royal Society of Chemistry journal article supplement (doi:10.1039/c7ra03527f), 2017-01-01
Supplement: c7ra03527f1.pdf [file c7ra03527f1.pdf]

Data File E:\DATA\2016\201612\2\SIG1000013.D

Sample Name: 5

=====  
Acq. Operator : ZLL  
Acq. Instrument : Instrument 1 Location : Vial 1  
Injection Date : 2016-12-2 15:18:37  
Acq. Method : C:\CHEM32\1\METHODS\DEF\_LC.M  
Last changed : 2016-12-2 13:42:36 by ZLL  
(modified after loading)  
Analysis Method : C:\CHEM32\1\METHODS\DEF\_LC.M  
Last changed : 2016-12-2 15:25:29 by ZLL  
(modified after loading)

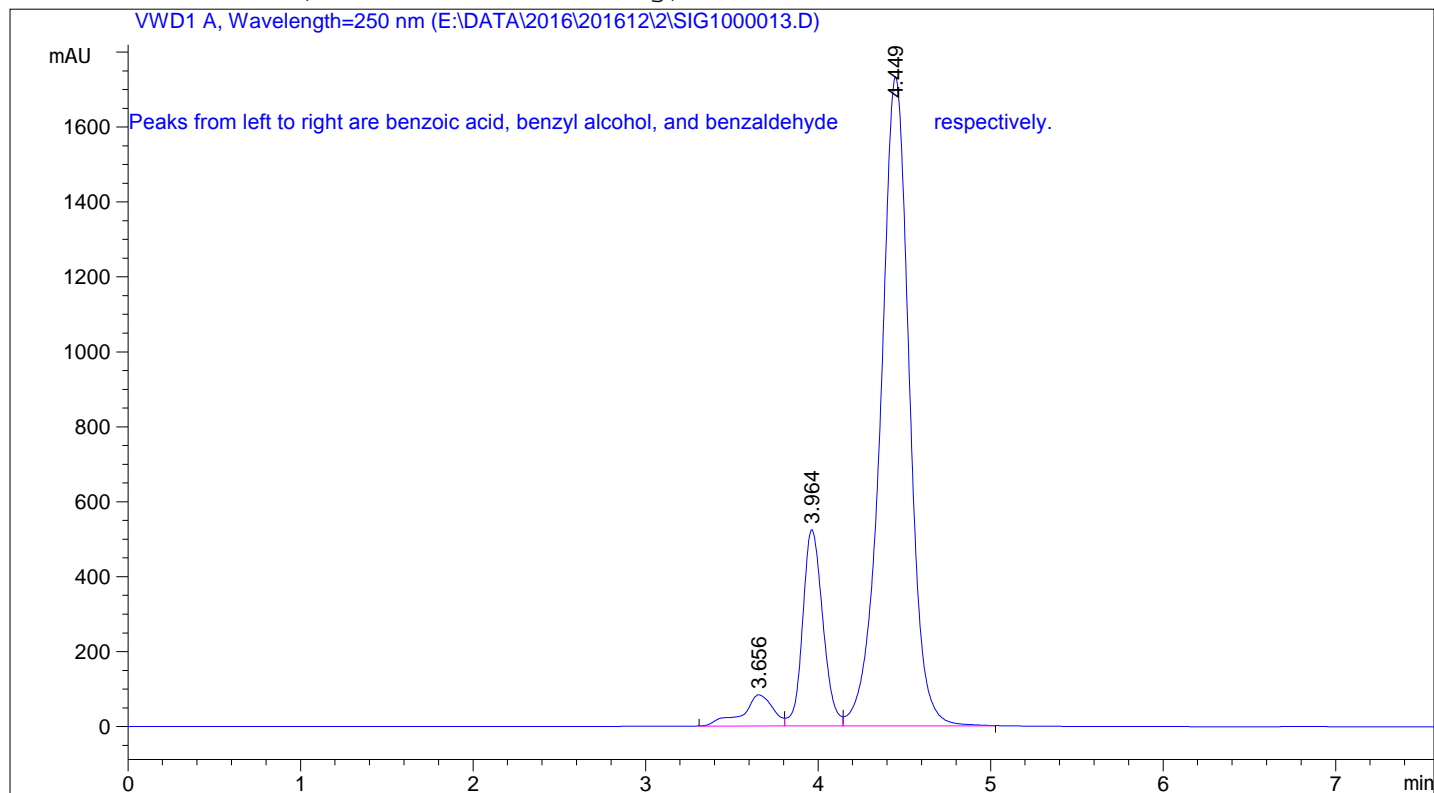

=====  
Area Percent Report  
=====

Sorted By : Signal  
Multiplier : 1.0000  
Dilution : 1.0000  
Use Multiplier & Dilution Factor with ISTDs

Signal 1: VWD1 A, Wavelength=250 nm

| Peak # | RetTime [min] | Type | Width [min] | Area mAU*s | Height [mAU] | Area %  |
|--------|---------------|------|-------------|------------|--------------|---------|
| 1      | 3.656         | BV   | 0.1837      | 1033.52820 | 83.48224     | 4.0918  |
| 2      | 3.964         | VV   | 0.1269      | 4262.67285 | 524.48297    | 16.8763 |
| 3      | 4.449         | VB   | 0.1752      | 1.99621e4  | 1732.28943   | 79.0318 |

Totals : 2.52583e4 2340.25464

=====  
\*\*\* End of Report \*\*\*

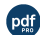

Sample Name: 6

```

=====
Acq. Operator   : ZLL
Acq. Instrument : Instrument 1                Location : Vial 1
Injection Date  : 2016-12-2 15:50:57
Acq. Method     : C:\CHEM32\1\METHODS\DEF_LC.M
Last changed    : 2016-12-2 13:42:36 by ZLL
                  (modified after loading)
Analysis Method : C:\CHEM32\1\METHODS\DEF_LC.M
Last changed    : 2016-12-2 15:43:26 by ZLL
                  (modified after loading)
    
```

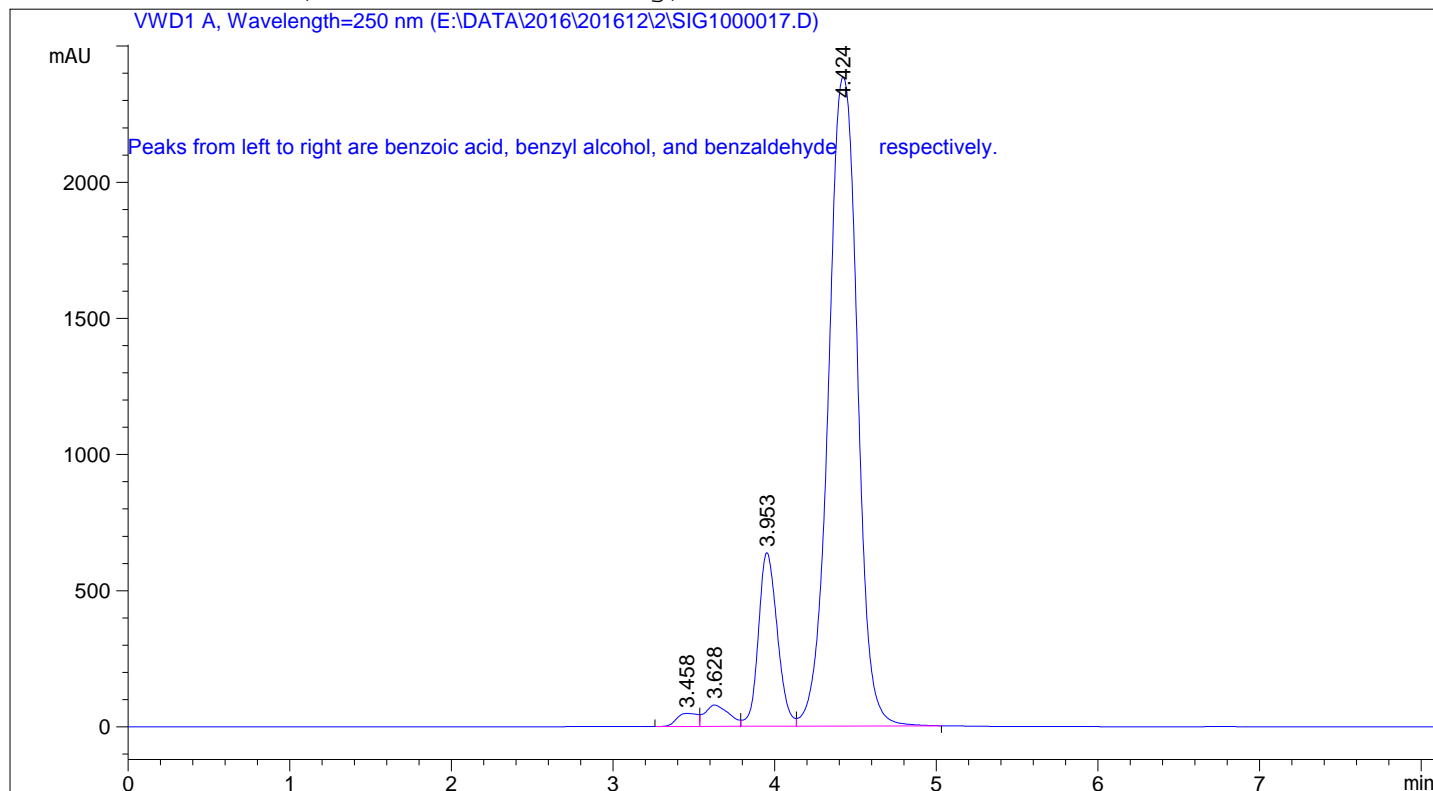

Area Percent Report

```

Sorted By      : Signal
Multiplier     : 1.0000
Dilution       : 1.0000
Use Multiplier & Dilution Factor with ISTDs
    
```

Signal 1: VWD1 A, Wavelength=250 nm

| Peak # | RetTime [min] | Type | Width [min] | Area mAU *s | Height [mAU] | Area %  |
|--------|---------------|------|-------------|-------------|--------------|---------|
| 1      | 3.458         | BV   | 0.1417      | 430.00388   | 47.66156     | 1.1924  |
| 2      | 3.628         | VV   | 0.1627      | 812.51129   | 78.66637     | 2.2532  |
| 3      | 3.953         | VV   | 0.1273      | 5210.06055  | 637.75739    | 14.4480 |
| 4      | 4.424         | VB   | 0.1944      | 2.96081e4   | 2384.19141   | 82.1064 |

Totals : 3.60607e4 3148.27672

\*\*\* End of Report \*\*\*



Sample Name: 7

```

=====
Acq. Operator   : ZLL
Acq. Instrument : Instrument 1           Location : Vial 1
Injection Date  : 2016-12-2 16:06:15
Acq. Method     : C:\CHEM32\1\METHODS\DEF_LC.M
Last changed    : 2016-12-2 13:42:36 by ZLL
                  (modified after loading)
Analysis Method : C:\CHEM32\1\METHODS\DEF_LC.M
Last changed    : 2016-12-2 15:43:26 by ZLL
                  (modified after loading)
=====

```

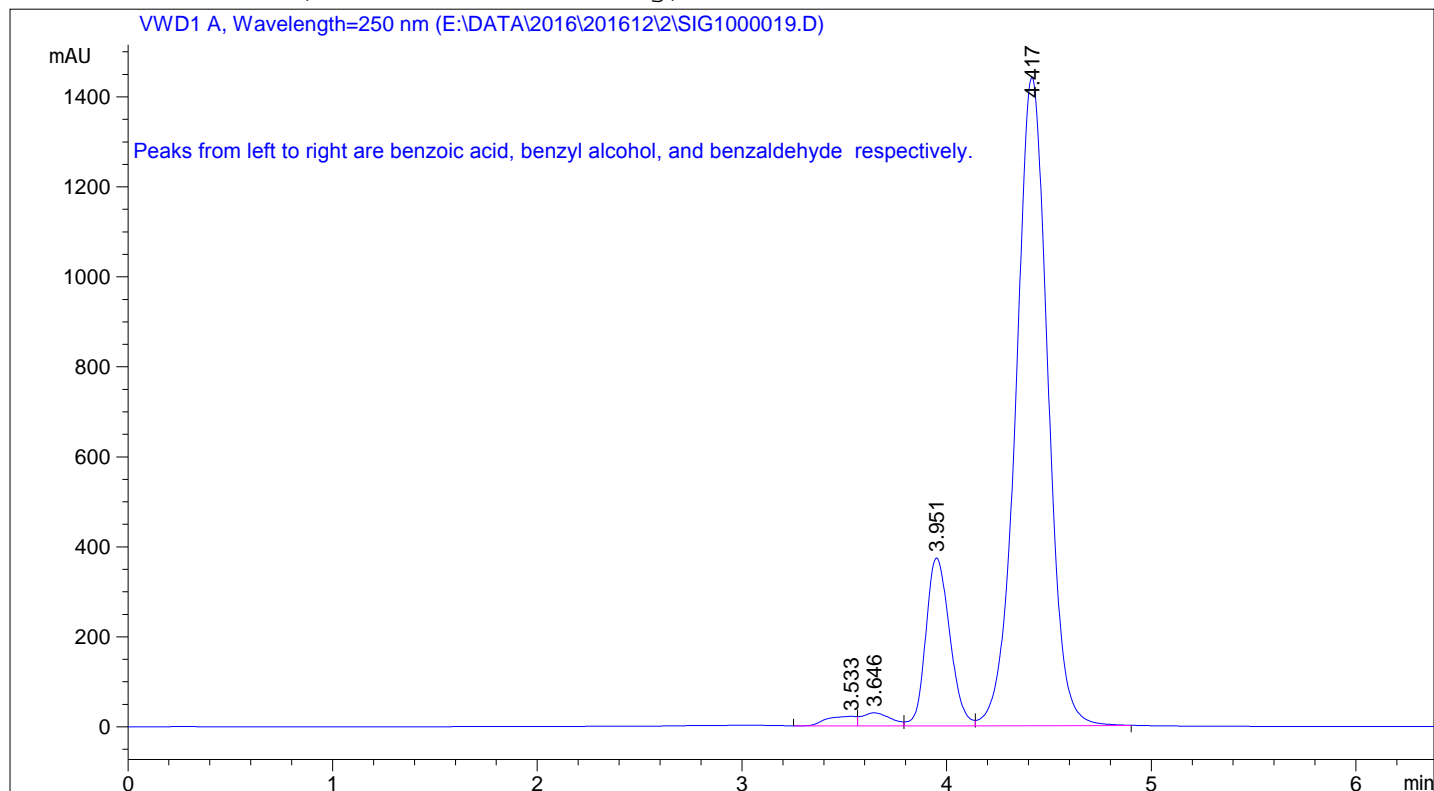

```

=====
                          Area Percent Report
=====

```

```

Sorted By           :      Signal
Multiplier           :      1.0000
Dilution             :      1.0000
Use Multiplier & Dilution Factor with ISTDs

```

Signal 1: VWD1 A, Wavelength=250 nm

| Peak # | RetTime [min] | Type | Width [min] | Area mAU*s | Height [mAU] | Area %  |
|--------|---------------|------|-------------|------------|--------------|---------|
| 1      | 3.533         | BV   | 0.1363      | 212.80144  | 20.88745     | 1.1152  |
| 2      | 3.646         | VV   | 0.1458      | 277.17236  | 28.79626     | 1.4525  |
| 3      | 3.951         | VV   | 0.1280      | 3024.13916 | 373.44586    | 15.8476 |
| 4      | 4.417         | VB   | 0.1653      | 1.55686e4  | 1441.57886   | 81.5848 |

```
Totals :                      1.90827e4  1864.70843
```

```

=====
*** End of Report ***
=====

```
